# Supplementary material for: Promotion of S-nitrosation of cysteine by a {Co(NO)2}10 complex
Source: Royal Society of Chemistry journal article supplement (doi:10.1039/d3cc02784h), 2023-01-01

Supporting information for

**Promotion of S-Nitrosation of Cysteine by  $\{\text{Co}(\text{NO})_2\}^{10}$   
Complex**

Chien-Wei Chiang,<sup>a\*</sup> Kai-Wun Jhang,<sup>a</sup> Jeng-Lung Chen,<sup>b</sup> Liang-Ching Hsu,<sup>b</sup> Wei-Hsiang Huang,<sup>b</sup> Hung-Chi Chen,<sup>a</sup> Ting-Jun Lin,<sup>a</sup> Ci-Yang Sun,<sup>a</sup> and Yu-Ning Li<sup>a</sup>

<sup>a</sup>*Department of Chemistry, Soochow University, No.70, Linhsi Road, Shihlin District, Taipei 111002, Taiwan.*

<sup>b</sup>*National Synchrotron Radiation Research Centre, Hsinchu 30076, Taiwan*

## Table of Contents

### General Information

**X-ray Data Collection and Structure Determination for  $\text{Co}(\text{ArLFe})(\text{NO})_2$  (1) and  $\text{Co}(\text{ArLFe})_2$ .**

**Fig. S1 GC of the resulting solution of Cys-S-S-Cys with ferrocene.**

**Fig. S2 CV of  $\text{Co}(\text{ArLFe})(\text{NO})_2$  (1) with scan rate at 50 mV**

**Fig. S3 The time-course analysis of  $\nu\text{NO}(\text{ArLFeCo}(\text{NO})_2)$  in the reaction of  $\text{ArLFeCo}(\text{NO})_2$  with  $\text{BocNH-Cys-COOMe}$**

**Fig. S4 EI-MS of (a)  $\text{BocNH-Cys-COOMe}$  and (b)  $\text{BocNH-CysNO-COOMe}$**

**Fig. S5 ESI-MS of (a)  $\text{BocNH-Cys-COOMe}$  and (b)  $\text{BocNH-CysNO-COOMe}$**

**Fig. S6 EPR spectrum of complex 1**

**Fig. S7  $^1\text{H}$  NMR of the formation of  $\text{BocNH-CysNO-COOMe}$**

**Fig. S8  $^{31}\text{P}$  NMR of the formation of  $\text{HNPPH}_3$**

## Materials and Methods

All glassware was oven dried at 110 °C for hours and cooled down under vacuum. All manipulations were carried out by using standard Schlenk techniques. Unless otherwise noted, materials were obtained from commercial suppliers and used without further purification. Thin layer chromatography (TLC) employed glass 0.25 mm silica gel plates. Flash chromatography columns were packed with 200-300 mesh silica gel. All manipulations were operated under a nitrogen or argon atmosphere using standard Schlenk techniques or in a glovebox. THF, toluene, hexane, and diethyl-ether were purified by Na/benzophenone and distilled prior to use. ArLFC, BocNH-Cys-COOMe, and  $\text{Co}_2(\text{NO})_4\text{Cl}_2$  were synthesized according to the literature methods.<sup>[12]-[14]</sup> Other chemical reagents were obtained from commercial sources and used as received unless stated otherwise. UV-vis spectra were recorded with Agilent 8454 spectrophotometer. Infrared spectra were recorded with Bruker ALPHA II FTIR. Cyclic voltammetry measurements were performed by means of a three-electrode technique by using a home-built computer-controlled instrument on THF solutions containing 0.1M tetrabutylammonium tetrafluoroborate as electrolyte with Ag wire used as reference electrode and a glassy carbon electrode as the working electrode.

## X-ray Data Collection and Structure Determination.

X-ray diffraction data of crystals of **1** was collected on a Bruker Kappa APEX II CCD diffractometer employing Mo  $K\alpha$  radiation ( $\lambda = 0.7107 \text{ \AA}$ ) at 200 K and with a  $\theta$ - $2\theta$  scan mode. The space groups for **1** was determined on the basis of systematic absences and intensity statistics. Their structures were solved by direct methods using SIR92 or SIR97, and refined using SHELXL-97 with anisotropic displacement factors for all non-hydrogen atoms. The detailed crystallographic data of **1** was provided in their crystallographic information files.

## Synthesis Procedure

*Synthesis of  $\text{Co}(\text{ArLFC})(\text{NO})_2$  (**1**):*  $\text{Co}(\text{ArLFC})(\text{NO})_2$  (**1**) was synthesized by reacting ArLFC (88.4 mg, 0.2 mmol) with nBuLi (0.08 mL, 0.2 mmol) in 15 mL of THF in a 50 mL Schlenk flask. The solution was stirred for 3 h at r.t. and then filtered. The filtrate was then reacted with  $\text{Co}_2(\text{NO})_4\text{Cl}_2$  (30.9 mg, 0.1 m and stirred for 15 h at 100 °C. Eventually, the solution was concentrated under vacuum and recrystallized with hexane at ambient temperature. Deep Brown crystals of **1** were obtained in 68% yield over 6 days. Absorption spectrum (THF) [ $\lambda_{\text{max}}$ , nm ( $\epsilon$ ,  $\text{M}^{-1} \text{ cm}^{-1}$ ): 330 (12000), 390 (17500), 450 (4000), 630 (800). Anal. Calcd for  $\text{C}_{27}\text{H}_{33}\text{CoFeN}_4\text{O}_2$  (F.W. = 560.37): C, 57.87; H, 5.94; N, 10.00. Found: C, 57.814; H, 5.890; N, 9.991.

*Reaction of Co(ArLFc)(NO)<sub>2</sub> (1) with BocNH-Cys-COOMe:* A dry schlenk tube equipped with a stirring bar was charged with Co(II)(ArLFc)(NO)<sub>2</sub> (**1**) (0.2 mmol, 1.0 equiv.) dissolved in THF (5 mL) and was then transferred to the THF solution (5 mL) of BocNH-Cys-COOMe (0.2 mmol, 1.0 equiv.). The reaction was detected by UV-Vis (diluted to 2 x 10<sup>-5</sup> M), IR spectroscopies, and GC-MS.

### **Computational Details**

Density functional theory (DFT) calculations were carried out using the Gaussian 09 program. Geometries of all stationary points were fully optimized using the dispersion-corrected (U)B3LYP functional. Single-point energy calculations were carried out using a mixed basis set comprised of 6-31g+(d,p) for N and O, 6-31g for C and H, and the pseudopotential (def2-TZVPPD) level for the Co and Fe atoms.

**X-ray Data Collection and Structure Determination for Co(ArLFc)(NO)<sub>2</sub> (1) and Co(ArLFc)<sub>2</sub>.**

| ATOM | X           | Y           | Z           |
|------|-------------|-------------|-------------|
| C    | 10.61600000 | 4.95300000  | 3.28400000  |
| C    | 11.39900000 | 5.00500000  | 4.47600000  |
| C    | 12.32900000 | 3.90800000  | 4.43300000  |
| C    | 12.15000000 | 3.20600000  | 3.23000000  |
| C    | 11.10100000 | 3.85500000  | 2.49700000  |
| C    | 14.58100000 | 5.75600000  | 2.00000000  |
| C    | 14.31000000 | 5.03600000  | 1.69700000  |
| C    | 13.30600000 | 5.65300000  | 0.99100000  |
| C    | 12.90800000 | 6.81300000  | 1.73600000  |
| C    | 13.72000000 | 6.87500000  | 2.91300000  |
| C    | 8.26800000  | 4.12300000  | 1.82400000  |
| C    | 8.54200000  | 5.55800000  | 2.24400000  |
| C    | 7.57500000  | 6.49400000  | 1.82200000  |
| C    | 7.58400000  | 7.87800000  | 2.00000000  |
| C    | 6.53800000  | 8.64700000  | 1.21600000  |
| C    | 8.38900000  | 9.93700000  | 2.92500000  |
| C    | 9.39300000  | 10.67200000 | 2.22900000  |
| C    | 10.38900000 | 9.97400000  | 1.33700000  |
| C    | 9.84500000  | 9.77100000  | -0.08000000 |
| C    | 11.73800000 | 10.67800000 | 1.30300000  |
| C    | 9.40300000  | 12.05100000 | 2.37600000  |
| C    | 8.47400000  | 12.70300000 | 3.19800000  |

|    |             |             |            |
|----|-------------|-------------|------------|
| C  | 7.53900000  | 11.96200000 | 3.87600000 |
| C  | 7.47300000  | 10.58000000 | 3.76600000 |
| C  | 6.45000000  | 9.80800000  | 4.57500000 |
| C  | 6.73900000  | 9.98700000  | 6.08800000 |
| C  | 5.02600000  | 10.26100000 | 4.28400000 |
| Co | 9.55700000  | 7.54800000  | 4.05600000 |
| Fe | 12.64100000 | 5.12900000  | 2.82900000 |
| N  | 8.72100000  | 7.16500000  | 5.48800000 |
| N  | 10.89400000 | 8.44600000  | 4.38600000 |
| N  | 9.58600000  | 5.88500000  | 2.99800000 |
| N  | 8.40900000  | 8.50000000  | 2.81600000 |
| O  | 8.75500000  | 7.24700000  | 6.65900000 |
| O  | 11.78700000 | 9.21600000  | 4.42500000 |
| H  | 11.31700000 | 5.68300000  | 5.20700000 |
| H  | 13.00500000 | 3.69000000  | 5.13700000 |
| H  | 12.65800000 | 2.39500000  | 2.94100000 |
| H  | 10.75300000 | 3.57600000  | 1.60300000 |
| H  | 15.25900000 | 5.51600000  | 3.58300000 |
| H  | 14.76900000 | 4.19200000  | 1.42100000 |
| H  | 12.92700000 | 5.35300000  | 0.11600000 |
| H  | 12.19700000 | 7.46700000  | 1.47600000 |
| H  | 13.67000000 | 7.56800000  | 3.63300000 |
| H  | 7.30100000  | 3.96200000  | 1.82300000 |
| H  | 8.70000000  | 3.51000000  | 2.45500000 |
| H  | 8.62600000  | 3.97200000  | 0.92400000 |

|   |             |             |             |
|---|-------------|-------------|-------------|
| H | 6.82500000  | 6.13900000  | 1.36000000  |
| H | 6.68700000  | 9.60900000  | 1.33000000  |
| H | 5.64500000  | 8.41400000  | 1.54700000  |
| H | 6.60500000  | 8.41600000  | 0.26700000  |
| H | 10.54300000 | 9.06600000  | 1.72500000  |
| H | 9.76000000  | 10.64000000 | -0.52500000 |
| H | 8.96500000  | 9.34000000  | -0.03400000 |
| H | 10.46100000 | 9.20300000  | -0.58900000 |
| H | 12.38500000 | 10.12100000 | 0.82100000  |
| H | 12.05100000 | 10.82600000 | 2.21900000  |
| H | 11.64500000 | 11.53900000 | 0.84400000  |
| H | 10.05300000 | 12.56400000 | 1.91100000  |
| H | 8.49100000  | 13.64900000 | 3.28500000  |
| H | 6.91700000  | 12.40900000 | 4.43800000  |
| H | 6.52900000  | 8.83800000  | 4.34700000  |
| H | 7.68300000  | 9.79300000  | 6.26400000  |
| H | 6.17700000  | 9.37000000  | 6.60200000  |
| H | 6.53800000  | 10.90900000 | 6.35100000  |
| H | 4.86100000  | 10.21800000 | 3.31900000  |
| H | 4.90800000  | 11.18400000 | 4.59400000  |
| H | 4.39500000  | 9.67500000  | 4.75100000  |

**Table S1. Crystal data and structure refinement for Co(ArLFc)(NO)<sub>2</sub> (1).**

|                                   |                                                                     |                 |
|-----------------------------------|---------------------------------------------------------------------|-----------------|
| Identification code               | d20202a                                                             |                 |
| Empirical formula                 | C <sub>27</sub> H <sub>33</sub> Co Fe N <sub>4</sub> O <sub>2</sub> |                 |
| Formula weight                    | 560.35                                                              |                 |
| Temperature                       | 200(2) K                                                            |                 |
| Wavelength                        | 0.71073 Å                                                           |                 |
| Crystal system                    | Triclinic                                                           |                 |
| Space group                       | P -1                                                                |                 |
| Unit cell dimensions              | a = 10.2255(12) Å                                                   | α = 84.859(3)°. |
|                                   | b = 11.5646(13) Å                                                   | β = 76.424(3)°. |
|                                   | c = 11.7408(12) Å                                                   | γ = 75.669(3)°. |
| Volume                            | 1306.9(3) Å <sup>3</sup>                                            |                 |
| Z                                 | 2                                                                   |                 |
| Density (calculated)              | 1.424 Mg/m <sup>3</sup>                                             |                 |
| Absorption coefficient            | 1.220 mm <sup>-1</sup>                                              |                 |
| F(000)                            | 584                                                                 |                 |
| Crystal size                      | 0.57 x 0.42 x 0.14 mm <sup>3</sup>                                  |                 |
| Theta range for data collection   | 2.59 to 25.06°.                                                     |                 |
| Index ranges                      | -12 ≤ h ≤ 12, -13 ≤ k ≤ 13, -13 ≤ l ≤ 13                            |                 |
| Reflections collected             | 27393                                                               |                 |
| Independent reflections           | 4549 [R(int) = 0.0477]                                              |                 |
| Completeness to theta = 25.06°    | 98.2 %                                                              |                 |
| Absorption correction             | multi-scan                                                          |                 |
| Max. and min. transmission        | 0.8477 and 0.5430                                                   |                 |
| Refinement method                 | Full-matrix least-squares on F <sup>2</sup>                         |                 |
| Data / restraints / parameters    | 4549 / 0 / 322                                                      |                 |
| Goodness-of-fit on F <sup>2</sup> | 1.176                                                               |                 |
| Final R indices [I > 2σ(I)]       | R <sub>1</sub> = 0.0787, wR <sub>2</sub> = 0.2294                   |                 |
| R indices (all data)              | R <sub>1</sub> = 0.0852, wR <sub>2</sub> = 0.2331                   |                 |
| Largest diff. peak and hole       | 1.459 and -0.680 e.Å <sup>-3</sup>                                  |                 |



Atomic coordinates ( $\times 10^4$ ) and equivalent isotropic displacement parameters ( $\text{\AA}^2 \times 10^3$ ) for d20202a.  $U(\text{eq})$  is defined as one third of the trace of the orthogonalized  $U^{ij}$  tensor.

|       | x         | y        | z        | U(eq) |
|-------|-----------|----------|----------|-------|
| C(1)  | 8396(8)   | 4322(7)  | 2879(7)  | 25(2) |
| C(2)  | 8877(9)   | 4333(8)  | 3924(7)  | 31(2) |
| C(3)  | 10071(10) | 3355(8)  | 3886(8)  | 40(2) |
| C(4)  | 10345(9)  | 2765(8)  | 2832(8)  | 37(2) |
| C(5)  | 9324(8)   | 3366(7)  | 2189(8)  | 29(2) |
| C(6)  | 12163(10) | 5051(11) | 2532(10) | 53(3) |
| C(7)  | 12349(10) | 4444(9)  | 1488(9)  | 46(2) |
| C(8)  | 11374(10) | 5016(10) | 869(9)   | 46(2) |
| C(9)  | 10525(10) | 6029(9)  | 1522(12) | 57(3) |
| C(10) | 11036(11) | 6049(10) | 2554(12) | 62(3) |
| C(11) | 6640(9)   | 3625(7)  | 1599(7)  | 29(2) |
| C(12) | 6454(8)   | 4893(6)  | 1967(7)  | 22(2) |
| C(13) | 5370(8)   | 5741(7)  | 1597(7)  | 24(2) |
| C(14) | 4993(8)   | 6971(7)  | 1753(6)  | 25(2) |
| C(15) | 3956(10)  | 7681(8)  | 1066(8)  | 39(2) |
| C(16) | 5055(8)   | 8781(6)  | 2564(7)  | 23(2) |
| C(17) | 6012(8)   | 9458(7)  | 1954(7)  | 27(2) |
| C(18) | 7363(10)  | 8862(8)  | 1172(8)  | 39(2) |
| C(19) | 7205(15)  | 8723(12) | -70(10)  | 69(4) |
| C(20) | 8514(11)  | 9491(11) | 1142(12) | 65(3) |
| C(21) | 5643(10)  | 10684(8) | 2083(8)  | 37(2) |
| C(22) | 4384(10)  | 11242(7) | 2804(8)  | 37(2) |
| C(23) | 3501(10)  | 10560(7) | 3398(8)  | 35(2) |
| C(24) | 3806(8)   | 9330(7)  | 3302(7)  | 29(2) |
| C(25) | 2814(9)   | 8617(8)  | 4011(8)  | 35(2) |
| C(26) | 2708(12)  | 8731(9)  | 5337(8)  | 46(2) |
| C(27) | 1375(10)  | 9030(10) | 3756(10) | 51(3) |
| Co(1) | 6536(1)   | 6616(1)  | 3556(1)  | 22(1) |
| Fe(1) | 10436(1)  | 4493(1)  | 2480(1)  | 28(1) |
| N(1)  | 5488(8)   | 6231(6)  | 4811(6)  | 36(2) |
| N(2)  | 7544(8)   | 7407(6)  | 3845(7)  | 34(2) |

|      |         |         |         |       |
|------|---------|---------|---------|-------|
| N(3) | 7221(6) | 5163(5) | 2628(5) | 20(1) |
| N(4) | 5458(6) | 7502(5) | 2469(5) | 23(1) |
| O(1) | 5234(9) | 6269(7) | 5838(6) | 57(2) |
| O(2) | 8216(8) | 8093(6) | 3879(7) | 54(2) |

---

Bond lengths [Å] and angles [°] for d20202a.

---

|            |           |
|------------|-----------|
| C(1)-N(3)  | 1.418(10) |
| C(1)-C(2)  | 1.426(11) |
| C(1)-C(5)  | 1.436(11) |
| C(1)-Fe(1) | 2.082(8)  |
| C(2)-C(3)  | 1.439(12) |
| C(2)-Fe(1) | 2.066(9)  |
| C(2)-H(2)  | 1.0000    |
| C(3)-C(4)  | 1.403(13) |
| C(3)-Fe(1) | 2.039(9)  |
| C(3)-H(3)  | 1.0000    |
| C(4)-C(5)  | 1.435(12) |
| C(4)-Fe(1) | 2.025(9)  |
| C(4)-H(4)  | 1.0000    |
| C(5)-Fe(1) | 2.026(8)  |
| C(5)-H(5)  | 1.0000    |
| C(6)-C(10) | 1.412(17) |
| C(6)-C(7)  | 1.418(15) |
| C(6)-Fe(1) | 2.040(10) |
| C(6)-H(6)  | 1.0000    |
| C(7)-C(8)  | 1.374(14) |
| C(7)-Fe(1) | 2.019(9)  |
| C(7)-H(7)  | 1.0000    |
| C(8)-C(9)  | 1.435(15) |
| C(8)-Fe(1) | 2.024(10) |
| C(8)-H(8)  | 1.0000    |
| C(9)-C(10) | 1.432(18) |
| C(9)-Fe(1) | 2.026(10) |
| C(9)-H(9)  | 1.0000    |

|              |           |
|--------------|-----------|
| C(10)-Fe(1)  | 2.055(11) |
| C(10)-H(10)  | 1.0000    |
| C(11)-C(12)  | 1.519(10) |
| C(11)-H(11A) | 0.9800    |
| C(11)-H(11B) | 0.9800    |
| C(11)-H(11C) | 0.9800    |
| C(12)-N(3)   | 1.329(10) |
| C(12)-C(13)  | 1.410(11) |
| C(13)-C(14)  | 1.395(11) |
| C(13)-H(13)  | 0.9500    |
| C(14)-N(4)   | 1.317(10) |
| C(14)-C(15)  | 1.517(11) |
| C(15)-H(15A) | 0.9800    |
| C(15)-H(15B) | 0.9800    |
| C(15)-H(15C) | 0.9800    |
| C(16)-C(24)  | 1.401(11) |
| C(16)-C(17)  | 1.426(11) |
| C(16)-N(4)   | 1.441(9)  |
| C(17)-C(21)  | 1.387(12) |
| C(17)-C(18)  | 1.508(12) |
| C(18)-C(20)  | 1.521(14) |
| C(18)-C(19)  | 1.531(15) |
| C(18)-H(18)  | 1.0000    |
| C(19)-H(19A) | 0.9800    |
| C(19)-H(19B) | 0.9800    |
| C(19)-H(19C) | 0.9800    |
| C(20)-H(20A) | 0.9800    |
| C(20)-H(20B) | 0.9800    |
| C(20)-H(20C) | 0.9800    |
| C(21)-C(22)  | 1.402(13) |
| C(21)-H(21)  | 0.9500    |
| C(22)-C(23)  | 1.372(13) |
| C(22)-H(22)  | 0.9500    |
| C(23)-C(24)  | 1.387(11) |
| C(23)-H(23)  | 0.9500    |
| C(24)-C(25)  | 1.515(12) |

|                 |           |
|-----------------|-----------|
| C(25)-C(27)     | 1.522(13) |
| C(25)-C(26)     | 1.550(13) |
| C(25)-H(25)     | 1.0000    |
| C(26)-H(26A)    | 0.9800    |
| C(26)-H(26B)    | 0.9800    |
| C(26)-H(26C)    | 0.9800    |
| C(27)-H(27A)    | 0.9800    |
| C(27)-H(27B)    | 0.9800    |
| C(27)-H(27C)    | 0.9800    |
| Co(1)-N(2)      | 1.644(7)  |
| Co(1)-N(1)      | 1.701(7)  |
| Co(1)-N(4)      | 1.939(6)  |
| Co(1)-N(3)      | 1.971(6)  |
| N(1)-O(1)       | 1.175(9)  |
| N(2)-O(2)       | 1.180(9)  |
|                 |           |
| N(3)-C(1)-C(2)  | 122.9(7)  |
| N(3)-C(1)-C(5)  | 129.6(7)  |
| C(2)-C(1)-C(5)  | 107.5(7)  |
| N(3)-C(1)-Fe(1) | 127.3(5)  |
| C(2)-C(1)-Fe(1) | 69.3(5)   |
| C(5)-C(1)-Fe(1) | 67.5(4)   |
| C(1)-C(2)-C(3)  | 107.6(8)  |
| C(1)-C(2)-Fe(1) | 70.5(5)   |
| C(3)-C(2)-Fe(1) | 68.5(5)   |
| C(1)-C(2)-H(2)  | 126.2     |
| C(3)-C(2)-H(2)  | 126.2     |
| Fe(1)-C(2)-H(2) | 126.2     |
| C(4)-C(3)-C(2)  | 108.9(8)  |
| C(4)-C(3)-Fe(1) | 69.3(5)   |
| C(2)-C(3)-Fe(1) | 70.5(5)   |
| C(4)-C(3)-H(3)  | 125.5     |
| C(2)-C(3)-H(3)  | 125.5     |
| Fe(1)-C(3)-H(3) | 125.5     |
| C(3)-C(4)-C(5)  | 107.7(8)  |
| C(3)-C(4)-Fe(1) | 70.3(5)   |

|                  |           |
|------------------|-----------|
| C(5)-C(4)-Fe(1)  | 69.3(5)   |
| C(3)-C(4)-H(4)   | 126.1     |
| C(5)-C(4)-H(4)   | 126.1     |
| Fe(1)-C(4)-H(4)  | 126.1     |
| C(4)-C(5)-C(1)   | 108.2(8)  |
| C(4)-C(5)-Fe(1)  | 69.2(5)   |
| C(1)-C(5)-Fe(1)  | 71.7(5)   |
| C(4)-C(5)-H(5)   | 125.9     |
| C(1)-C(5)-H(5)   | 125.9     |
| Fe(1)-C(5)-H(5)  | 125.9     |
| C(10)-C(6)-C(7)  | 107.5(11) |
| C(10)-C(6)-Fe(1) | 70.4(6)   |
| C(7)-C(6)-Fe(1)  | 68.8(6)   |
| C(10)-C(6)-H(6)  | 126.2     |
| C(7)-C(6)-H(6)   | 126.2     |
| Fe(1)-C(6)-H(6)  | 126.2     |
| C(8)-C(7)-C(6)   | 110.1(10) |
| C(8)-C(7)-Fe(1)  | 70.3(6)   |
| C(6)-C(7)-Fe(1)  | 70.4(5)   |
| C(8)-C(7)-H(7)   | 124.9     |
| C(6)-C(7)-H(7)   | 124.9     |
| Fe(1)-C(7)-H(7)  | 124.9     |
| C(7)-C(8)-C(9)   | 107.4(10) |
| C(7)-C(8)-Fe(1)  | 69.9(6)   |
| C(9)-C(8)-Fe(1)  | 69.3(6)   |
| C(7)-C(8)-H(8)   | 126.3     |
| C(9)-C(8)-H(8)   | 126.3     |
| Fe(1)-C(8)-H(8)  | 126.3     |
| C(10)-C(9)-C(8)  | 107.7(9)  |
| C(10)-C(9)-Fe(1) | 70.5(6)   |
| C(8)-C(9)-Fe(1)  | 69.2(6)   |
| C(10)-C(9)-H(9)  | 126.1     |
| C(8)-C(9)-H(9)   | 126.1     |
| Fe(1)-C(9)-H(9)  | 126.1     |
| C(6)-C(10)-C(9)  | 107.3(10) |
| C(6)-C(10)-Fe(1) | 69.3(6)   |

|                     |          |
|---------------------|----------|
| C(9)-C(10)-Fe(1)    | 68.4(6)  |
| C(6)-C(10)-H(10)    | 126.3    |
| C(9)-C(10)-H(10)    | 126.3    |
| Fe(1)-C(10)-H(10)   | 126.3    |
| C(12)-C(11)-H(11A)  | 109.5    |
| C(12)-C(11)-H(11B)  | 109.5    |
| H(11A)-C(11)-H(11B) | 109.5    |
| C(12)-C(11)-H(11C)  | 109.5    |
| H(11A)-C(11)-H(11C) | 109.5    |
| H(11B)-C(11)-H(11C) | 109.5    |
| N(3)-C(12)-C(13)    | 123.0(7) |
| N(3)-C(12)-C(11)    | 122.1(7) |
| C(13)-C(12)-C(11)   | 114.9(7) |
| C(14)-C(13)-C(12)   | 128.0(7) |
| C(14)-C(13)-H(13)   | 116.0    |
| C(12)-C(13)-H(13)   | 116.0    |
| N(4)-C(14)-C(13)    | 123.5(7) |
| N(4)-C(14)-C(15)    | 120.8(7) |
| C(13)-C(14)-C(15)   | 115.7(7) |
| C(14)-C(15)-H(15A)  | 109.5    |
| C(14)-C(15)-H(15B)  | 109.5    |
| H(15A)-C(15)-H(15B) | 109.5    |
| C(14)-C(15)-H(15C)  | 109.5    |
| H(15A)-C(15)-H(15C) | 109.5    |
| H(15B)-C(15)-H(15C) | 109.5    |
| C(24)-C(16)-C(17)   | 121.2(7) |
| C(24)-C(16)-N(4)    | 120.8(7) |
| C(17)-C(16)-N(4)    | 117.9(7) |
| C(21)-C(17)-C(16)   | 117.7(8) |
| C(21)-C(17)-C(18)   | 121.2(8) |
| C(16)-C(17)-C(18)   | 121.1(7) |
| C(17)-C(18)-C(20)   | 112.7(8) |
| C(17)-C(18)-C(19)   | 112.0(9) |
| C(20)-C(18)-C(19)   | 110.8(9) |
| C(17)-C(18)-H(18)   | 107.0    |
| C(20)-C(18)-H(18)   | 107.0    |

|                     |          |
|---------------------|----------|
| C(19)-C(18)-H(18)   | 107.0    |
| C(18)-C(19)-H(19A)  | 109.5    |
| C(18)-C(19)-H(19B)  | 109.5    |
| H(19A)-C(19)-H(19B) | 109.5    |
| C(18)-C(19)-H(19C)  | 109.5    |
| H(19A)-C(19)-H(19C) | 109.5    |
| H(19B)-C(19)-H(19C) | 109.5    |
| C(18)-C(20)-H(20A)  | 109.5    |
| C(18)-C(20)-H(20B)  | 109.5    |
| H(20A)-C(20)-H(20B) | 109.5    |
| C(18)-C(20)-H(20C)  | 109.5    |
| H(20A)-C(20)-H(20C) | 109.5    |
| H(20B)-C(20)-H(20C) | 109.5    |
| C(17)-C(21)-C(22)   | 121.4(8) |
| C(17)-C(21)-H(21)   | 119.3    |
| C(22)-C(21)-H(21)   | 119.3    |
| C(23)-C(22)-C(21)   | 119.3(8) |
| C(23)-C(22)-H(22)   | 120.3    |
| C(21)-C(22)-H(22)   | 120.3    |
| C(22)-C(23)-C(24)   | 122.1(8) |
| C(22)-C(23)-H(23)   | 118.9    |
| C(24)-C(23)-H(23)   | 118.9    |
| C(23)-C(24)-C(16)   | 118.2(8) |
| C(23)-C(24)-C(25)   | 119.8(8) |
| C(16)-C(24)-C(25)   | 121.9(7) |
| C(24)-C(25)-C(27)   | 112.2(8) |
| C(24)-C(25)-C(26)   | 109.7(7) |
| C(27)-C(25)-C(26)   | 109.1(8) |
| C(24)-C(25)-H(25)   | 108.6    |
| C(27)-C(25)-H(25)   | 108.6    |
| C(26)-C(25)-H(25)   | 108.6    |
| C(25)-C(26)-H(26A)  | 109.5    |
| C(25)-C(26)-H(26B)  | 109.5    |
| H(26A)-C(26)-H(26B) | 109.5    |
| C(25)-C(26)-H(26C)  | 109.5    |
| H(26A)-C(26)-H(26C) | 109.5    |

|                     |          |
|---------------------|----------|
| H(26B)-C(26)-H(26C) | 109.5    |
| C(25)-C(27)-H(27A)  | 109.5    |
| C(25)-C(27)-H(27B)  | 109.5    |
| H(27A)-C(27)-H(27B) | 109.5    |
| C(25)-C(27)-H(27C)  | 109.5    |
| H(27A)-C(27)-H(27C) | 109.5    |
| H(27B)-C(27)-H(27C) | 109.5    |
| N(2)-Co(1)-N(1)     | 110.7(4) |
| N(2)-Co(1)-N(4)     | 110.0(3) |
| N(1)-Co(1)-N(4)     | 111.0(3) |
| N(2)-Co(1)-N(3)     | 123.8(3) |
| N(1)-Co(1)-N(3)     | 105.6(3) |
| N(4)-Co(1)-N(3)     | 94.6(3)  |
| C(7)-Fe(1)-C(8)     | 39.7(4)  |
| C(7)-Fe(1)-C(4)     | 105.5(4) |
| C(8)-Fe(1)-C(4)     | 120.4(4) |
| C(7)-Fe(1)-C(9)     | 68.1(4)  |
| C(8)-Fe(1)-C(9)     | 41.5(4)  |
| C(4)-Fe(1)-C(9)     | 158.2(5) |
| C(7)-Fe(1)-C(5)     | 120.5(4) |
| C(8)-Fe(1)-C(5)     | 105.3(4) |
| C(4)-Fe(1)-C(5)     | 41.5(3)  |
| C(9)-Fe(1)-C(5)     | 122.3(5) |
| C(7)-Fe(1)-C(3)     | 122.6(4) |
| C(8)-Fe(1)-C(3)     | 156.8(4) |
| C(4)-Fe(1)-C(3)     | 40.4(4)  |
| C(9)-Fe(1)-C(3)     | 160.4(5) |
| C(5)-Fe(1)-C(3)     | 68.6(4)  |
| C(7)-Fe(1)-C(6)     | 40.9(4)  |
| C(8)-Fe(1)-C(6)     | 68.5(4)  |
| C(4)-Fe(1)-C(6)     | 121.1(4) |
| C(9)-Fe(1)-C(6)     | 68.6(5)  |
| C(5)-Fe(1)-C(6)     | 157.1(4) |
| C(3)-Fe(1)-C(6)     | 107.8(5) |
| C(7)-Fe(1)-C(10)    | 68.1(4)  |
| C(8)-Fe(1)-C(10)    | 69.2(5)  |



|                  |          |
|------------------|----------|
| C(4)-Fe(1)-C(10) | 157.9(5) |
| C(9)-Fe(1)-C(10) | 41.1(5)  |
| C(5)-Fe(1)-C(10) | 160.2(5) |
| C(3)-Fe(1)-C(10) | 123.8(5) |
| C(6)-Fe(1)-C(10) | 40.3(5)  |
| C(7)-Fe(1)-C(2)  | 160.2(4) |
| C(8)-Fe(1)-C(2)  | 159.5(4) |
| C(4)-Fe(1)-C(2)  | 68.8(4)  |
| C(9)-Fe(1)-C(2)  | 124.0(4) |
| C(5)-Fe(1)-C(2)  | 68.6(3)  |
| C(3)-Fe(1)-C(2)  | 41.0(3)  |
| C(6)-Fe(1)-C(2)  | 124.6(4) |
| C(10)-Fe(1)-C(2) | 109.5(4) |
| C(7)-Fe(1)-C(1)  | 157.3(4) |
| C(8)-Fe(1)-C(1)  | 122.7(4) |
| C(4)-Fe(1)-C(1)  | 68.9(3)  |
| C(9)-Fe(1)-C(1)  | 108.4(4) |
| C(5)-Fe(1)-C(1)  | 40.9(3)  |
| C(3)-Fe(1)-C(1)  | 68.2(3)  |
| C(6)-Fe(1)-C(1)  | 160.8(4) |
| C(10)-Fe(1)-C(1) | 125.0(4) |
| C(2)-Fe(1)-C(1)  | 40.2(3)  |
| O(1)-N(1)-Co(1)  | 144.0(7) |
| O(2)-N(2)-Co(1)  | 168.1(7) |
| C(12)-N(3)-C(1)  | 121.5(6) |
| C(12)-N(3)-Co(1) | 120.1(5) |
| C(1)-N(3)-Co(1)  | 117.2(5) |
| C(14)-N(4)-C(16) | 120.6(6) |
| C(14)-N(4)-Co(1) | 122.3(5) |
| C(16)-N(4)-Co(1) | 116.7(5) |

---

Symmetry transformations used to generate equivalent atoms:

Anisotropic displacement parameters ( $\text{\AA}^2 \times 10^3$ ) for d20202a. The anisotropic displacement factor exponent takes the form:  $-2\pi^2 [ h^2 a^{*2} U^{11} + \dots + 2 h k a^* b^* U^{12} ]$

|       | $U^{11}$ | $U^{22}$ | $U^{33}$ | $U^{23}$ | $U^{13}$ | $U^{12}$ |
|-------|----------|----------|----------|----------|----------|----------|
| C(1)  | 26(4)    | 22(4)    | 24(4)    | 1(3)     | -2(3)    | -7(3)    |
| C(2)  | 33(5)    | 36(5)    | 24(4)    | 4(3)     | -10(3)   | -7(4)    |
| C(3)  | 35(5)    | 41(5)    | 35(5)    | 7(4)     | -9(4)    | 5(4)     |
| C(4)  | 34(5)    | 34(5)    | 37(5)    | 4(4)     | -4(4)    | -4(4)    |
| C(5)  | 25(4)    | 22(4)    | 37(5)    | -5(3)    | -2(3)    | -3(3)    |
| C(6)  | 27(5)    | 82(8)    | 54(6)    | -9(6)    | 3(4)     | -29(5)   |
| C(7)  | 25(5)    | 51(6)    | 56(6)    | -3(5)    | -2(4)    | -8(4)    |
| C(8)  | 34(5)    | 64(7)    | 39(5)    | 5(5)     | -4(4)    | -18(5)   |
| C(9)  | 26(5)    | 42(6)    | 88(9)    | 21(6)    | 9(5)     | -10(4)   |
| C(10) | 42(6)    | 49(6)    | 83(9)    | -12(6)   | 25(6)    | -19(5)   |
| C(11) | 29(4)    | 23(4)    | 33(4)    | -11(3)   | 0(3)     | -9(3)    |
| C(12) | 21(4)    | 20(4)    | 24(4)    | -6(3)    | 6(3)     | -9(3)    |
| C(13) | 26(4)    | 28(4)    | 22(4)    | -8(3)    | -2(3)    | -11(3)   |
| C(14) | 25(4)    | 29(4)    | 19(4)    | -5(3)    | 1(3)     | -7(3)    |
| C(15) | 50(6)    | 38(5)    | 34(5)    | -8(4)    | -21(4)   | -6(4)    |
| C(16) | 27(4)    | 19(4)    | 27(4)    | -3(3)    | -11(3)   | -6(3)    |
| C(17) | 29(4)    | 27(4)    | 27(4)    | 2(3)     | -11(3)   | -9(3)    |
| C(18) | 38(5)    | 33(5)    | 40(5)    | 3(4)     | 2(4)     | -10(4)   |
| C(19) | 87(9)    | 67(8)    | 38(6)    | -15(5)   | 8(6)     | -6(7)    |
| C(20) | 40(6)    | 67(8)    | 82(9)    | -4(6)    | 15(6)    | -30(6)   |
| C(21) | 42(5)    | 28(4)    | 45(5)    | 5(4)     | -12(4)   | -17(4)   |
| C(22) | 53(6)    | 20(4)    | 42(5)    | -2(4)    | -13(4)   | -12(4)   |
| C(23) | 41(5)    | 23(4)    | 38(5)    | -7(4)    | -14(4)   | 3(4)     |
| C(24) | 26(4)    | 27(4)    | 33(4)    | -7(3)    | -9(3)    | -3(3)    |
| C(25) | 34(5)    | 31(4)    | 34(5)    | -8(4)    | 5(4)     | -8(4)    |
| C(26) | 61(7)    | 42(5)    | 33(5)    | 3(4)     | -4(5)    | -15(5)   |
| C(27) | 30(5)    | 57(6)    | 63(7)    | -4(5)    | -2(5)    | -11(5)   |
| Co(1) | 25(1)    | 22(1)    | 22(1)    | -4(1)    | -6(1)    | -6(1)    |
| Fe(1) | 22(1)    | 32(1)    | 28(1)    | -1(1)    | -3(1)    | -6(1)    |
| N(1)  | 44(4)    | 33(4)    | 26(4)    | -1(3)    | -2(3)    | -9(3)    |
| N(2)  | 35(4)    | 28(4)    | 43(4)    | -8(3)    | -16(3)   | -7(3)    |

|      |       |       |       |       |        |        |
|------|-------|-------|-------|-------|--------|--------|
| N(3) | 17(3) | 20(3) | 20(3) | -2(2) | 1(2)   | -6(2)  |
| N(4) | 23(3) | 19(3) | 25(3) | -3(2) | -2(3)  | -6(3)  |
| O(1) | 81(6) | 56(5) | 28(4) | -3(3) | 2(4)   | -18(4) |
| O(2) | 58(5) | 49(4) | 69(5) | -6(4) | -21(4) | -30(4) |

Hydrogen coordinates (  $\times 10^4$ ) and isotropic displacement parameters ( $\text{\AA}^2 \times 10^3$ )  
for d20202a.

|        | x     | y     | z    | U(eq) |
|--------|-------|-------|------|-------|
| H(2)   | 8461  | 4916  | 4565 | 37    |
| H(3)   | 10625 | 3140  | 4504 | 48    |
| H(4)   | 11110 | 2050  | 2578 | 44    |
| H(5)   | 9257  | 3144  | 1405 | 35    |
| H(6)   | 12728 | 4816  | 3141 | 64    |
| H(7)   | 13072 | 3699  | 1246 | 55    |
| H(8)   | 11278 | 4774  | 102  | 55    |
| H(9)   | 9726  | 6620  | 1294 | 68    |
| H(10)  | 10650 | 6646  | 3185 | 75    |
| H(11A) | 5735  | 3482  | 1598 | 43    |
| H(11B) | 7072  | 3059  | 2152 | 43    |
| H(11C) | 7233  | 3517  | 810  | 43    |
| H(13)  | 4831  | 5438  | 1192 | 29    |
| H(15A) | 3836  | 8536  | 1166 | 58    |
| H(15B) | 3066  | 7463  | 1356 | 58    |
| H(15C) | 4296  | 7503  | 234  | 58    |
| H(18)  | 7652  | 8040  | 1512 | 46    |
| H(19A) | 7006  | 9512  | -460 | 103   |
| H(19B) | 6442  | 8337  | -30  | 103   |
| H(19C) | 8065  | 8231  | -516 | 103   |
| H(20A) | 9396  | 9008  | 720  | 97    |
| H(20B) | 8575  | 9596  | 1945 | 97    |
| H(20C) | 8313  | 10273 | 740  | 97    |
| H(21)  | 6257  | 11156 | 1675 | 44    |

|        |      |       |      |    |
|--------|------|-------|------|----|
| H(22)  | 4145 | 12083 | 2880 | 45 |
| H(23)  | 2653 | 10942 | 3891 | 42 |
| H(25)  | 3186 | 7758  | 3811 | 42 |
| H(26A) | 3639 | 8553  | 5492 | 69 |
| H(26B) | 2195 | 8165  | 5788 | 69 |
| H(26C) | 2221 | 9546  | 5568 | 69 |
| H(27A) | 1444 | 9020  | 2910 | 77 |
| H(27B) | 958  | 9844  | 4028 | 77 |
| H(27C) | 798  | 8493  | 4165 | 77 |

---

d20202a

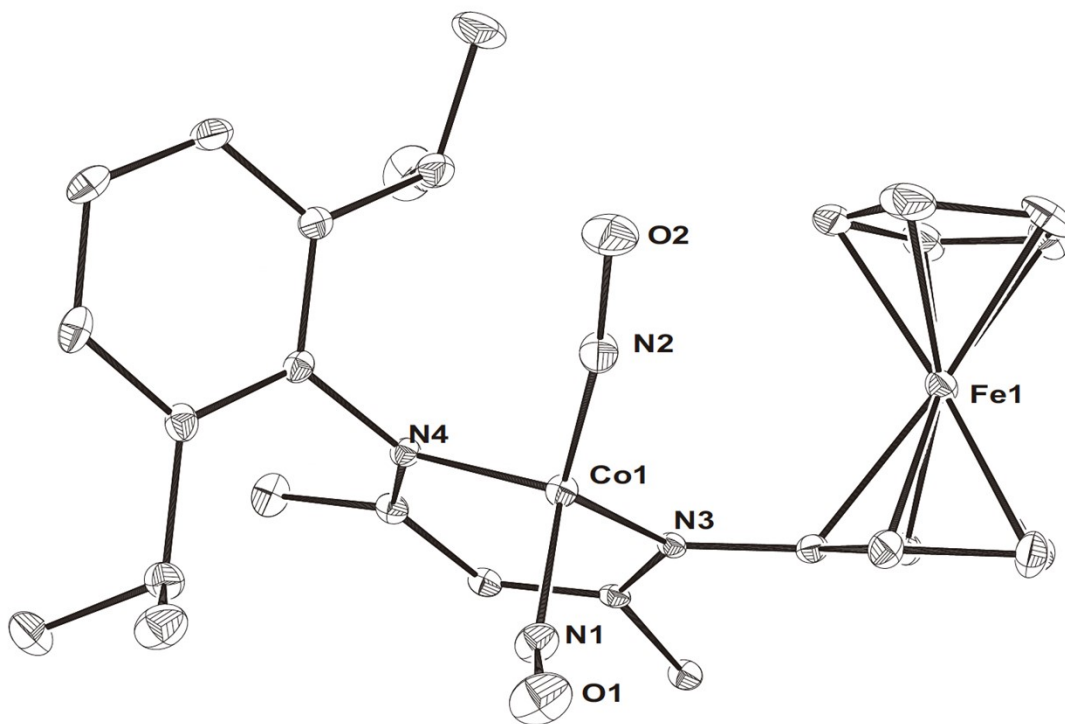

**Table S2. Crystal data and structure refinement for Co(ArLFC)<sub>2</sub>.**

|                                             |                                                                |
|---------------------------------------------|----------------------------------------------------------------|
| Identification code                         | mo_SYC_2_195_0m                                                |
| Empirical formula                           | C <sub>20</sub> H <sub>30</sub> CoFeN <sub>4</sub> LiClBrO     |
| Formula weight                              | 579.56                                                         |
| Temperature/K                               | 193.15                                                         |
| Crystal system                              | triclinic                                                      |
| Space group                                 | P-1                                                            |
| a/Å                                         | 10.5731(6)                                                     |
| b/Å                                         | 10.7617(6)                                                     |
| c/Å                                         | 23.8337(13)                                                    |
| α/°                                         | 87.5440(10)                                                    |
| β/°                                         | 82.4670(10)                                                    |
| γ/°                                         | 80.5960(10)                                                    |
| Volume/Å <sup>3</sup>                       | 2651.7(3)                                                      |
| Z                                           | 1                                                              |
| ρ <sub>calc</sub> /cm <sup>3</sup>          | 0.363                                                          |
| μ/mm <sup>-1</sup>                          | 0.699                                                          |
| F(000)                                      | 294.0                                                          |
| Crystal size/mm <sup>3</sup>                | 0.23 x 0.33 x 0.21 cm <sup>3</sup>                             |
| Radiation                                   | MoKα (λ = 0.71073)                                             |
| 2θ range for data collection/°              | 3.936 to 55.014                                                |
| Index ranges                                | -13 ≤ h ≤ 13, -13 ≤ k ≤ 13, -30 ≤ l ≤ 30                       |
| Reflections collected                       | 40740                                                          |
| Independent reflections                     | 12140 [R <sub>int</sub> = 0.0187, R <sub>sigma</sub> = 0.0209] |
| Data/restraints/parameters                  | 12140/0/562                                                    |
| Goodness-of-fit on F <sup>2</sup>           | 1.073                                                          |
| Final R indexes [I >= 2σ (I)]               | R <sub>1</sub> = 0.0837, wR <sub>2</sub> = 0.2764              |
| Final R indexes [all data]                  | R <sub>1</sub> = 0.0902, wR <sub>2</sub> = 0.2834              |
| Largest diff. peak/hole / e Å <sup>-3</sup> | 5.23/-0.66                                                     |

| Atom | x         | y         | z          | U(eq)     |
|------|-----------|-----------|------------|-----------|
| Co1  | 6799.8(5) | 2597.9(5) | 2188.0(2)  | 14.83(17) |
| Fe1  | 3134.9(6) | 5444.7(6) | 3030.2(3)  | 25.25(19) |
| Fe2  | 8119.5(6) | 3738.2(7) | 3904.4(3)  | 25.6(2)   |
| N1   | 7157(4)   | 713(3)    | 2248.8(15) | 19.8(7)   |
| N2   | 4999(3)   | 2813(3)   | 2611.1(15) | 19.6(7)   |
| N3   | 7006(3)   | 3417(3)   | 1421.4(14) | 17.7(7)   |
| N4   | 7900(3)   | 3620(3)   | 2548.8(15) | 17.7(7)   |
| C0AA | 8380(6)   | 1820(5)   | 3868(2)    | 36.6(12)  |
| C1   | 6481(5)   | 136(4)    | 2665.9(19) | 23.9(9)   |
| C2   | 4576(4)   | 1880(4)   | 2930.1(18) | 21.3(8)   |

|     |          |          |            |          |
|-----|----------|----------|------------|----------|
| C3  | 5331(5)  | 681(4)   | 2981.6(19) | 24.8(9)  |
| C6  | 3251(5)  | 2038(5)  | 3277(2)    | 30.3(10) |
| C7  | 6958(6)  | -1225(5) | 2831(2)    | 38.4(13) |
| C8  | 4219(4)  | 3986(4)  | 2528.5(19) | 23.4(9)  |
| C9  | 4743(5)  | 5135(5)  | 2436(2)    | 31.1(11) |
| C10 | 3777(5)  | 6084(5)  | 2247(2)    | 37.0(12) |
| C11 | 2650(5)  | 5545(5)  | 2230(2)    | 35.3(11) |
| C12 | 2899(5)  | 4268(5)  | 2407(2)    | 27.1(9)  |
| C13 | 3659(6)  | 6167(6)  | 3733(3)    | 42.8(13) |
| C14 | 2704(6)  | 7028(5)  | 3506(3)    | 42.0(13) |
| C15 | 1588(5)  | 6443(6)  | 3509(3)    | 39.0(12) |
| C16 | 1866(5)  | 5206(5)  | 3741(2)    | 35.4(11) |
| C17 | 3156(6)  | 5027(5)  | 3878(2)    | 37.1(11) |
| C18 | 8136(4)  | -131(4)  | 1902.3(18) | 21.5(8)  |
| C19 | 9425(5)  | -367(4)  | 2019(2)    | 25.7(9)  |
| C20 | 10286(5) | -1318(5) | 1728(2)    | 30.9(10) |
| C21 | 9904(5)  | -2008(4) | 1319(2)    | 32.9(11) |
| C22 | 8651(6)  | -1693(4) | 1179(2)    | 33.2(11) |
| C23 | 7747(5)  | -760(4)  | 1457(2)    | 25.8(9)  |
| C24 | 9912(5)  | 372(5)   | 2451(2)    | 29.1(10) |
| C25 | 10853(6) | 1187(6)  | 2154(3)    | 43.8(13) |
| C26 | 10560(8) | -479(7)  | 2896(3)    | 53.8(17) |
| C27 | 6395(5)  | -453(5)  | 1287(2)    | 32.6(11) |
| C28 | 5433(6)  | -1214(6) | 1635(3)    | 44.6(14) |
| C29 | 6378(7)  | -654(6)  | 663(3)     | 46.4(14) |
| C30 | 8216(4)  | 4684(4)  | 2304.3(18) | 18.9(8)  |
| C31 | 7285(4)  | 4586(4)  | 1378.7(18) | 20.3(8)  |
| C32 | 7813(4)  | 5164(4)  | 1788.9(18) | 20.8(8)  |
| C33 | 7012(6)  | 5401(5)  | 859(2)     | 31.4(10) |
| C34 | 9018(5)  | 5485(5)  | 2575(2)    | 29.5(10) |
| C35 | 8338(4)  | 3133(4)  | 3065.2(18) | 22.4(8)  |
| C36 | 9563(5)  | 3074(5)  | 3271(2)    | 27.9(10) |
| C37 | 9585(6)  | 2257(5)  | 3762(2)    | 36.2(12) |
| C39 | 7597(5)  | 2373(5)  | 3446(2)    | 28.6(10) |
| C40 | 7323(7)  | 4121(7)  | 4721(2)    | 46.6(14) |
| C41 | 8486(7)  | 4612(7)  | 4596(3)    | 51.8(17) |
| C42 | 8343(6)  | 5495(6)  | 4134(3)    | 47.7(16) |
| C43 | 7115(6)  | 5534(6)  | 3975(3)    | 42.9(13) |
| C44 | 6465(6)  | 4676(6)  | 4340(3)    | 44.7(14) |
| C45 | 6872(4)  | 2883(4)  | 892.5(17)  | 20.5(8)  |
| C46 | 5655(5)  | 2907(5)  | 708.5(19)  | 26.0(9)  |
| C47 | 5624(6)  | 2477(5)  | 163(2)     | 34.8(11) |

|     |          |         |           |          |
|-----|----------|---------|-----------|----------|
| C48 | 6736(6)  | 2039(5) | -188(2)   | 38.5(13) |
| C49 | 7925(6)  | 1984(5) | 8(2)      | 32.2(11) |
| C50 | 8023(5)  | 2394(4) | 547.0(18) | 23.8(9)  |
| C51 | 9357(5)  | 2354(5) | 732(2)    | 28.9(10) |
| C52 | 10236(5) | 1115(5) | 594(2)    | 36.1(11) |
| C53 | 10025(6) | 3440(6) | 469(4)    | 52.2(17) |
| C54 | 4410(5)  | 3417(5) | 1065(2)   | 29.3(10) |
| C55 | 3621(6)  | 2359(6) | 1255(3)   | 44.9(14) |
| C56 | 3572(6)  | 4475(7) | 758(3)    | 50.5(15) |

| <b>Atom</b> | <b>U<sub>11</sub></b> | <b>U<sub>22</sub></b> | <b>U<sub>33</sub></b> | <b>U<sub>23</sub></b> | <b>U<sub>13</sub></b> | <b>U<sub>12</sub></b> |
|-------------|-----------------------|-----------------------|-----------------------|-----------------------|-----------------------|-----------------------|
| Co1         | 16.3(3)               | 14.7(3)               | 13.9(3)               | 0.53(19)              | -1.50(19)             | -4.1(2)               |
| Fe1         | 17.7(3)               | 24.3(3)               | 31.7(4)               | 0.7(3)                | -0.2(3)               | 0.2(2)                |
| Fe2         | 24.8(4)               | 32.6(4)               | 20.7(3)               | -5.0(3)               | -6.1(2)               | -4.8(3)               |
| N1          | 24.1(18)              | 14.8(15)              | 19.7(17)              | 0.4(13)               | 0.9(14)               | -3.6(13)              |
| N2          | 16.2(16)              | 22.2(17)              | 19.8(17)              | 2.1(13)               | -0.1(13)              | -3.9(13)              |
| N3          | 21.2(17)              | 18.6(16)              | 14.2(15)              | 1.4(12)               | -3.1(12)              | -6.1(13)              |
| N4          | 19.2(16)              | 18.7(16)              | 16.4(16)              | -0.5(13)              | -4.8(13)              | -4.0(13)              |
| C0AA        | 56(3)                 | 30(2)                 | 26(2)                 | 4.9(19)               | -15(2)                | -6(2)                 |
| C1          | 31(2)                 | 16.5(19)              | 24(2)                 | 3.4(16)               | -0.5(17)              | -4.8(16)              |
| C2          | 21(2)                 | 25(2)                 | 19.1(19)              | 0.5(16)               | -1.7(15)              | -6.7(16)              |
| C3          | 30(2)                 | 22(2)                 | 22(2)                 | 5.3(16)               | 2.0(17)               | -7.5(17)              |
| C6          | 25(2)                 | 33(2)                 | 30(2)                 | 4.4(19)               | 5.9(18)               | -6.6(19)              |
| C7          | 44(3)                 | 23(2)                 | 41(3)                 | 13(2)                 | 11(2)                 | 3(2)                  |
| C8          | 20(2)                 | 25(2)                 | 23(2)                 | 0.7(16)               | 3.2(16)               | -3.4(16)              |
| C9          | 21(2)                 | 26(2)                 | 43(3)                 | 5(2)                  | 6.7(19)               | -1.8(18)              |
| C10         | 30(3)                 | 31(3)                 | 43(3)                 | 12(2)                 | 8(2)                  | 3(2)                  |
| C11         | 30(3)                 | 39(3)                 | 32(3)                 | 9(2)                  | -1(2)                 | 5(2)                  |
| C12         | 22(2)                 | 33(2)                 | 24(2)                 | 3.5(18)               | -1.9(17)              | -2.8(18)              |
| C13         | 42(3)                 | 41(3)                 | 49(3)                 | -7(3)                 | -17(3)                | -8(2)                 |
| C14         | 40(3)                 | 29(3)                 | 55(4)                 | -9(2)                 | -3(3)                 | 0(2)                  |
| C15         | 23(2)                 | 42(3)                 | 45(3)                 | -9(2)                 | 5(2)                  | 7(2)                  |
| C16         | 34(3)                 | 38(3)                 | 32(3)                 | -7(2)                 | 6(2)                  | -5(2)                 |
| C17         | 41(3)                 | 38(3)                 | 31(3)                 | -1(2)                 | -7(2)                 | -3(2)                 |
| C18         | 28(2)                 | 13.4(18)              | 22(2)                 | 1.5(15)               | 2.2(16)               | -4.7(15)              |
| C19         | 31(2)                 | 19(2)                 | 25(2)                 | 0.7(16)               | 0.7(18)               | -2.2(17)              |
| C20         | 28(2)                 | 24(2)                 | 37(3)                 | 0.1(19)               | 5.1(19)               | 0.7(18)               |
| C21         | 42(3)                 | 19(2)                 | 33(3)                 | -1.7(18)              | 10(2)                 | -0.3(19)              |
| C22         | 50(3)                 | 21(2)                 | 28(2)                 | -4.6(18)              | 9(2)                  | -16(2)                |
| C23         | 35(2)                 | 17.7(19)              | 26(2)                 | 0.0(16)               | 2.4(18)               | -12.8(17)             |
| C24         | 27(2)                 | 28(2)                 | 31(2)                 | -4.1(18)              | -6.2(18)              | 3.1(18)               |

|     |          |          |          |          |           |           |
|-----|----------|----------|----------|----------|-----------|-----------|
| C25 | 42(3)    | 52(3)    | 43(3)    | -8(3)    | -7(2)     | -18(3)    |
| C26 | 69(5)    | 46(4)    | 43(3)    | 3(3)     | -21(3)    | 12(3)     |
| C27 | 41(3)    | 25(2)    | 35(3)    | -1.8(19) | -8(2)     | -13(2)    |
| C28 | 45(3)    | 47(3)    | 47(3)    | -3(3)    | -3(3)     | -25(3)    |
| C29 | 65(4)    | 42(3)    | 40(3)    | 0(2)     | -15(3)    | -24(3)    |
| C30 | 17.0(18) | 18.3(18) | 21.4(19) | -3.8(15) | -1.9(15)  | -2.8(14)  |
| C31 | 25(2)    | 18.8(19) | 17.4(18) | 2.0(15)  | -1.4(15)  | -6.2(15)  |
| C32 | 24(2)    | 18.4(19) | 21(2)    | 1.0(15)  | -2.5(16)  | -8.4(15)  |
| C33 | 50(3)    | 23(2)    | 25(2)    | 7.9(18)  | -14(2)    | -13(2)    |
| C34 | 31(2)    | 28(2)    | 34(2)    | -2.9(19) | -9.2(19)  | -14.3(19) |
| C35 | 27(2)    | 22(2)    | 19(2)    | -3.1(16) | -7.3(16)  | -2.2(16)  |
| C36 | 25(2)    | 35(2)    | 23(2)    | -6.9(18) | -5.9(17)  | 1.0(18)   |
| C37 | 41(3)    | 40(3)    | 27(2)    | -3(2)    | -16(2)    | 7(2)      |
| C39 | 40(3)    | 27(2)    | 22(2)    | 1.9(17)  | -11.3(19) | -11.0(19) |
| C40 | 53(4)    | 58(4)    | 26(3)    | -11(2)   | 5(2)      | -7(3)     |
| C41 | 52(4)    | 71(4)    | 35(3)    | -28(3)   | -9(3)     | -9(3)     |
| C42 | 41(3)    | 51(3)    | 52(4)    | -31(3)   | 9(3)      | -13(3)    |
| C43 | 35(3)    | 37(3)    | 53(3)    | -9(3)    | 7(2)      | -1(2)     |
| C44 | 31(3)    | 49(3)    | 50(3)    | -6(3)    | 9(2)      | -4(2)     |
| C45 | 31(2)    | 19.5(19) | 13.6(18) | 3.7(14)  | -4.6(15)  | -10.7(16) |
| C46 | 31(2)    | 30(2)    | 20(2)    | 3.6(17)  | -7.3(17)  | -11.5(18) |
| C47 | 44(3)    | 43(3)    | 24(2)    | -1(2)    | -14(2)    | -18(2)    |
| C48 | 61(4)    | 41(3)    | 18(2)    | -5(2)    | -5(2)     | -20(3)    |
| C49 | 45(3)    | 33(2)    | 20(2)    | -4.0(18) | 1.6(19)   | -12(2)    |
| C50 | 32(2)    | 22(2)    | 19(2)    | 0.0(16)  | -0.1(17)  | -10.2(17) |
| C51 | 29(2)    | 32(2)    | 25(2)    | -7.7(18) | 1.7(18)   | -8.0(19)  |
| C52 | 35(3)    | 36(3)    | 35(3)    | 0(2)     | 4(2)      | -4(2)     |
| C53 | 37(3)    | 35(3)    | 86(5)    | -7(3)    | 2(3)      | -16(2)    |
| C54 | 29(2)    | 38(3)    | 25(2)    | 2.8(19)  | -10.0(18) | -11(2)    |
| C55 | 38(3)    | 54(4)    | 46(3)    | 6(3)     | -2(2)     | -21(3)    |
| C56 | 40(3)    | 63(4)    | 48(4)    | 11(3)    | -13(3)    | -4(3)     |

| Atom | Atom | Length/Å | Atom | Atom | Length/Å |
|------|------|----------|------|------|----------|
| Co1  | N1   | 2.004(4) | C11  | C12  | 1.413(7) |
| Co1  | N2   | 2.017(4) | C13  | C14  | 1.402(9) |
| Co1  | N3   | 1.996(3) | C13  | C17  | 1.426(9) |
| Co1  | N4   | 2.016(3) | C14  | C15  | 1.425(9) |
| Fe1  | C8   | 2.103(4) | C15  | C16  | 1.419(8) |
| Fe1  | C9   | 2.057(5) | C16  | C17  | 1.425(8) |
| Fe1  | C10  | 2.032(5) | C18  | C19  | 1.407(7) |
| Fe1  | C11  | 2.033(6) | C18  | C23  | 1.423(6) |



|      |      |          |     |     |           |
|------|------|----------|-----|-----|-----------|
| Fe1  | C12  | 2.058(5) | C19 | C20 | 1.395(6)  |
| Fe1  | C13  | 2.052(6) | C19 | C24 | 1.518(7)  |
| Fe1  | C14  | 2.043(6) | C20 | C21 | 1.389(8)  |
| Fe1  | C15  | 2.043(5) | C21 | C22 | 1.393(8)  |
| Fe1  | C16  | 2.054(5) | C22 | C23 | 1.391(7)  |
| Fe1  | C17  | 2.054(6) | C23 | C27 | 1.517(7)  |
| Fe2  | C0AA | 2.042(5) | C24 | C25 | 1.520(8)  |
| Fe2  | C35  | 2.102(4) | C24 | C26 | 1.527(7)  |
| Fe2  | C36  | 2.061(5) | C27 | C28 | 1.545(7)  |
| Fe2  | C37  | 2.040(5) | C27 | C29 | 1.515(8)  |
| Fe2  | C39  | 2.055(5) | C30 | C32 | 1.403(6)  |
| Fe2  | C40  | 2.048(6) | C30 | C34 | 1.518(6)  |
| Fe2  | C41  | 2.042(6) | C31 | C32 | 1.401(6)  |
| Fe2  | C42  | 2.049(6) | C31 | C33 | 1.519(6)  |
| Fe2  | C43  | 2.050(6) | C35 | C36 | 1.436(6)  |
| Fe2  | C44  | 2.048(6) | C35 | C39 | 1.437(7)  |
| N1   | C1   | 1.338(6) | C36 | C37 | 1.434(7)  |
| N1   | C18  | 1.453(5) | C40 | C41 | 1.409(10) |
| N2   | C2   | 1.334(5) | C40 | C44 | 1.413(10) |
| N2   | C8   | 1.412(6) | C41 | C42 | 1.430(11) |
| N3   | C31  | 1.335(5) | C42 | C43 | 1.393(9)  |
| N3   | C45  | 1.441(5) | C43 | C44 | 1.436(9)  |
| N4   | C30  | 1.335(5) | C45 | C46 | 1.408(6)  |
| N4   | C35  | 1.421(5) | C45 | C50 | 1.415(6)  |
| C0AA | C37  | 1.418(9) | C46 | C47 | 1.405(6)  |
| C0AA | C39  | 1.435(7) | C46 | C54 | 1.505(7)  |
| C1   | C3   | 1.398(6) | C47 | C48 | 1.378(9)  |
| C1   | C7   | 1.522(6) | C48 | C49 | 1.390(8)  |
| C2   | C3   | 1.412(6) | C49 | C50 | 1.398(6)  |
| C2   | C6   | 1.519(6) | C50 | C51 | 1.526(7)  |
| C8   | C9   | 1.433(6) | C51 | C52 | 1.517(7)  |
| C8   | C12  | 1.443(6) | C51 | C53 | 1.533(8)  |
| C9   | C10  | 1.425(7) | C54 | C55 | 1.538(7)  |
| C10  | C11  | 1.414(8) | C54 | C56 | 1.544(8)  |

| Atom | Atom | Atom | Angle/°    | Atom | Atom | Atom | Angle/°  |
|------|------|------|------------|------|------|------|----------|
| N1   | Co1  | N2   | 96.69(15)  | N1   | C1   | C7   | 120.0(4) |
| N1   | Co1  | N4   | 119.47(15) | C3   | C1   | C7   | 114.7(4) |
| N3   | Co1  | N1   | 118.53(15) | N2   | C2   | C3   | 122.8(4) |
| N3   | Co1  | N2   | 116.79(15) | N2   | C2   | C6   | 122.4(4) |
| N3   | Co1  | N4   | 96.41(14)  | C3   | C2   | C6   | 114.8(4) |

|     |     |     |            |     |     |     |          |
|-----|-----|-----|------------|-----|-----|-----|----------|
| N4  | Co1 | N2  | 110.07(15) | C1  | C3  | C2  | 130.5(4) |
| C9  | Fe1 | C8  | 40.30(18)  | N2  | C8  | Fe1 | 137.7(3) |
| C9  | Fe1 | C12 | 68.1(2)    | N2  | C8  | C9  | 122.3(4) |
| C10 | Fe1 | C8  | 68.17(19)  | N2  | C8  | C12 | 130.1(4) |
| C10 | Fe1 | C9  | 40.8(2)    | C9  | C8  | Fe1 | 68.1(3)  |
| C10 | Fe1 | C11 | 40.7(2)    | C9  | C8  | C12 | 106.5(4) |
| C10 | Fe1 | C12 | 68.2(2)    | C12 | C8  | Fe1 | 68.1(3)  |
| C10 | Fe1 | C13 | 119.7(3)   | C8  | C9  | Fe1 | 71.6(3)  |
| C10 | Fe1 | C14 | 104.1(3)   | C10 | C9  | Fe1 | 68.7(3)  |
| C10 | Fe1 | C15 | 120.7(2)   | C10 | C9  | C8  | 108.4(5) |
| C10 | Fe1 | C16 | 158.4(2)   | C9  | C10 | Fe1 | 70.5(3)  |
| C10 | Fe1 | C17 | 157.1(2)   | C11 | C10 | Fe1 | 69.7(3)  |
| C11 | Fe1 | C8  | 68.1(2)    | C11 | C10 | C9  | 108.1(5) |
| C11 | Fe1 | C9  | 68.4(2)    | C10 | C11 | Fe1 | 69.6(3)  |
| C11 | Fe1 | C12 | 40.4(2)    | C12 | C11 | Fe1 | 70.8(3)  |
| C11 | Fe1 | C13 | 154.2(2)   | C12 | C11 | C10 | 108.5(4) |
| C11 | Fe1 | C14 | 118.7(2)   | C8  | C12 | Fe1 | 71.4(3)  |
| C11 | Fe1 | C15 | 105.3(2)   | C11 | C12 | Fe1 | 68.8(3)  |
| C11 | Fe1 | C16 | 123.8(2)   | C11 | C12 | C8  | 108.4(4) |
| C11 | Fe1 | C17 | 162.1(2)   | C14 | C13 | Fe1 | 69.6(3)  |
| C12 | Fe1 | C8  | 40.57(18)  | C14 | C13 | C17 | 108.4(5) |
| C13 | Fe1 | C8  | 126.6(2)   | C17 | C13 | Fe1 | 69.7(3)  |
| C13 | Fe1 | C9  | 108.0(3)   | C13 | C14 | Fe1 | 70.3(3)  |
| C13 | Fe1 | C12 | 164.0(2)   | C13 | C14 | C15 | 108.3(5) |
| C13 | Fe1 | C16 | 68.2(2)    | C15 | C14 | Fe1 | 69.6(3)  |
| C13 | Fe1 | C17 | 40.6(2)    | C14 | C15 | Fe1 | 69.6(3)  |
| C14 | Fe1 | C8  | 160.1(2)   | C16 | C15 | Fe1 | 70.1(3)  |
| C14 | Fe1 | C9  | 122.1(2)   | C16 | C15 | C14 | 107.9(5) |
| C14 | Fe1 | C12 | 155.4(2)   | C15 | C16 | Fe1 | 69.3(3)  |
| C14 | Fe1 | C13 | 40.0(2)    | C15 | C16 | C17 | 107.8(5) |
| C14 | Fe1 | C16 | 68.3(2)    | C17 | C16 | Fe1 | 69.7(3)  |
| C14 | Fe1 | C17 | 68.1(2)    | C13 | C17 | Fe1 | 69.6(3)  |
| C15 | Fe1 | C8  | 158.9(2)   | C16 | C17 | Fe1 | 69.7(3)  |
| C15 | Fe1 | C9  | 157.8(2)   | C16 | C17 | C13 | 107.6(5) |
| C15 | Fe1 | C12 | 121.6(2)   | C19 | C18 | N1  | 121.1(4) |
| C15 | Fe1 | C13 | 68.0(3)    | C19 | C18 | C23 | 120.6(4) |
| C15 | Fe1 | C14 | 40.8(2)    | C23 | C18 | N1  | 118.3(4) |
| C15 | Fe1 | C16 | 40.5(2)    | C18 | C19 | C24 | 122.3(4) |
| C15 | Fe1 | C17 | 68.3(2)    | C20 | C19 | C18 | 118.9(4) |
| C16 | Fe1 | C8  | 125.4(2)   | C20 | C19 | C24 | 118.8(5) |
| C16 | Fe1 | C9  | 160.2(2)   | C21 | C20 | C19 | 121.4(5) |
| C16 | Fe1 | C12 | 109.9(2)   | C20 | C21 | C22 | 118.7(4) |

|         |     |      |           |      |     |     |          |
|---------|-----|------|-----------|------|-----|-----|----------|
| C16     | Fe1 | C17  | 40.6(2)   | C23  | C22 | C21 | 122.4(5) |
| C17     | Fe1 | C8   | 111.6(2)  | C18  | C23 | C27 | 122.1(4) |
| C17     | Fe1 | C9   | 123.9(2)  | C22  | C23 | C18 | 117.6(5) |
| C17     | Fe1 | C12  | 127.6(2)  | C22  | C23 | C27 | 120.2(4) |
| C0AAFe2 |     | C35  | 68.39(19) | C19  | C24 | C25 | 109.8(4) |
| C0AAFe2 |     | C36  | 68.5(2)   | C19  | C24 | C26 | 112.5(5) |
| C0AAFe2 |     | C39  | 41.0(2)   | C25  | C24 | C26 | 109.7(5) |
| C0AAFe2 |     | C40  | 104.5(3)  | C23  | C27 | C28 | 112.8(5) |
| C0AAFe2 |     | C41  | 121.2(3)  | C29  | C27 | C23 | 112.2(5) |
| C0AAFe2 |     | C42  | 159.5(3)  | C29  | C27 | C28 | 108.9(5) |
| C0AAFe2 |     | C43  | 157.1(3)  | N4   | C30 | C32 | 122.9(4) |
| C0AAFe2 |     | C44  | 119.5(3)  | N4   | C30 | C34 | 122.0(4) |
| C36     | Fe2 | C35  | 40.32(18) | C32  | C30 | C34 | 115.0(4) |
| C37     | Fe2 | C0AA | 40.6(2)   | N3   | C31 | C32 | 125.0(4) |
| C37     | Fe2 | C35  | 68.40(18) | N3   | C31 | C33 | 120.0(4) |
| C37     | Fe2 | C36  | 40.9(2)   | C32  | C31 | C33 | 115.0(4) |
| C37     | Fe2 | C39  | 68.6(2)   | C31  | C32 | C30 | 130.2(4) |
| C37     | Fe2 | C40  | 118.7(3)  | N4   | C35 | Fe2 | 136.2(3) |
| C37     | Fe2 | C41  | 105.7(3)  | N4   | C35 | C36 | 131.3(4) |
| C37     | Fe2 | C42  | 124.7(3)  | N4   | C35 | C39 | 121.0(4) |
| C37     | Fe2 | C43  | 162.0(3)  | C36  | C35 | Fe2 | 68.3(2)  |
| C37     | Fe2 | C44  | 154.1(3)  | C36  | C35 | C39 | 106.9(4) |
| C39     | Fe2 | C35  | 40.42(18) | C39  | C35 | Fe2 | 68.0(3)  |
| C39     | Fe2 | C36  | 68.2(2)   | C35  | C36 | Fe2 | 71.4(3)  |
| C40     | Fe2 | C35  | 160.6(2)  | C37  | C36 | Fe2 | 68.7(3)  |
| C40     | Fe2 | C36  | 155.7(2)  | C37  | C36 | C35 | 108.5(5) |
| C40     | Fe2 | C39  | 122.6(2)  | C0AA | C37 | Fe2 | 69.8(3)  |
| C40     | Fe2 | C42  | 68.1(3)   | C0AA | C37 | C36 | 108.1(4) |
| C40     | Fe2 | C43  | 68.2(3)   | C36  | C37 | Fe2 | 70.4(3)  |
| C40     | Fe2 | C44  | 40.4(3)   | C0AA | C39 | Fe2 | 69.0(3)  |
| C41     | Fe2 | C35  | 158.8(3)  | C0AA | C39 | C35 | 108.4(5) |
| C41     | Fe2 | C36  | 122.1(2)  | C35  | C39 | Fe2 | 71.6(3)  |
| C41     | Fe2 | C39  | 158.3(3)  | C41  | C40 | Fe2 | 69.7(3)  |
| C41     | Fe2 | C40  | 40.3(3)   | C41  | C40 | C44 | 108.3(6) |
| C41     | Fe2 | C42  | 40.9(3)   | C44  | C40 | Fe2 | 69.8(3)  |
| C41     | Fe2 | C43  | 68.0(3)   | C40  | C41 | Fe2 | 70.1(3)  |
| C41     | Fe2 | C44  | 68.0(3)   | C40  | C41 | C42 | 107.7(6) |
| C42     | Fe2 | C35  | 124.6(2)  | C42  | C41 | Fe2 | 69.8(3)  |
| C42     | Fe2 | C36  | 110.1(2)  | C41  | C42 | Fe2 | 69.3(4)  |
| C42     | Fe2 | C39  | 159.0(3)  | C43  | C42 | Fe2 | 70.1(3)  |
| C42     | Fe2 | C43  | 39.7(3)   | C43  | C42 | C41 | 108.4(6) |
| C43     | Fe2 | C35  | 111.0(2)  | C42  | C43 | Fe2 | 70.1(4)  |

|     |      |     |          |     |     |     |          |
|-----|------|-----|----------|-----|-----|-----|----------|
| C43 | Fe2  | C36 | 126.9(2) | C42 | C43 | C44 | 108.0(6) |
| C43 | Fe2  | C39 | 123.4(2) | C44 | C43 | Fe2 | 69.4(3)  |
| C44 | Fe2  | C35 | 126.1(2) | C40 | C44 | Fe2 | 69.8(3)  |
| C44 | Fe2  | C36 | 163.4(2) | C40 | C44 | C43 | 107.5(6) |
| C44 | Fe2  | C39 | 107.4(2) | C43 | C44 | Fe2 | 69.6(3)  |
| C44 | Fe2  | C42 | 68.0(3)  | C46 | C45 | N3  | 121.8(4) |
| C44 | Fe2  | C43 | 41.0(2)  | C46 | C45 | C50 | 121.0(4) |
| C1  | N1   | Co1 | 118.5(3) | C50 | C45 | N3  | 117.1(4) |
| C1  | N1   | C18 | 114.3(3) | C45 | C46 | C54 | 122.5(4) |
| C18 | N1   | Co1 | 127.2(3) | C47 | C46 | C45 | 117.9(5) |
| C2  | N2   | Co1 | 121.3(3) | C47 | C46 | C54 | 119.6(4) |
| C2  | N2   | C8  | 123.0(4) | C48 | C47 | C46 | 122.1(5) |
| C8  | N2   | Co1 | 115.7(3) | C47 | C48 | C49 | 119.1(5) |
| C31 | N3   | Co1 | 118.5(3) | C48 | C49 | C50 | 121.6(5) |
| C31 | N3   | C45 | 114.8(3) | C45 | C50 | C51 | 122.4(4) |
| C45 | N3   | Co1 | 126.7(3) | C49 | C50 | C45 | 118.3(4) |
| C30 | N4   | Co1 | 121.1(3) | C49 | C50 | C51 | 119.3(4) |
| C30 | N4   | C35 | 122.3(4) | C50 | C51 | C53 | 112.1(5) |
| C35 | N4   | Co1 | 116.6(3) | C52 | C51 | C50 | 112.3(4) |
| C37 | C0AA | Fe2 | 69.6(3)  | C52 | C51 | C53 | 109.0(4) |
| C37 | C0AA | C39 | 108.0(5) | C46 | C54 | C55 | 110.9(5) |
| C39 | C0AA | Fe2 | 70.0(3)  | C46 | C54 | C56 | 112.7(4) |
| N1  | C1   | C3  | 125.4(4) | C55 | C54 | C56 | 109.5(5) |

**Hydrogen Atom Coordinates ( $\text{\AA}\times 10^4$ ) and Isotropic Displacement Parameters ( $\text{\AA}^2\times 10^3$ ) for mo\_SYC\_2\_195\_0m.**

| Atom | x       | y        | z       | U(eq) |
|------|---------|----------|---------|-------|
| H0AA | 8139.48 | 1270.38  | 4159.33 | 44    |
| H3   | 5011.29 | 171.04   | 3273.09 | 30    |
| H6A  | 2969.25 | 2910.8   | 3362.29 | 45    |
| H6B  | 3298.69 | 1552.81  | 3623.63 | 45    |
| H6C  | 2647.17 | 1749.08  | 3065.46 | 45    |
| H7A  | 7147.99 | -1727.9  | 2498.39 | 58    |
| H7B  | 6301.51 | -1540.22 | 3088.89 | 58    |
| H7C  | 7726.19 | -1266.16 | 3010.55 | 58    |
| H9   | 5572.76 | 5243.69  | 2491.14 | 37    |
| H10  | 3871.78 | 6913.38  | 2150.82 | 44    |
| H11  | 1875.11 | 5960.93  | 2121.01 | 42    |
| H12  | 2312.51 | 3704.15  | 2439.09 | 32    |
| H13  | 4480.51 | 6313.8   | 3780.7  | 51    |
| H14  | 2784.94 | 7842     | 3376.31 | 50    |
| H15  | 814.14  | 6806.57  | 3382.12 | 47    |

|      |          |          |         |    |
|------|----------|----------|---------|----|
| H16  | 1305.35  | 4617.19  | 3794.23 | 42 |
| H17  | 3591.68  | 4300.01  | 4034.17 | 45 |
| H20  | 11133.61 | -1493.54 | 1810.07 | 37 |
| H21  | 10473.95 | -2667.03 | 1141.21 | 40 |
| H22  | 8409.98  | -2121.07 | 889.85  | 40 |
| H24  | 9170.7   | 927.61   | 2645.3  | 35 |
| H25A | 11618.39 | 658.16   | 1987.13 | 66 |
| H25B | 11077.93 | 1725.83  | 2422.92 | 66 |
| H25C | 10456.28 | 1692.83  | 1862.74 | 66 |
| H26A | 9928.14  | -897.43  | 3121.56 | 81 |
| H26B | 10931.39 | 21.27    | 3134.55 | 81 |
| H26C | 11226.42 | -1094.51 | 2710.9  | 81 |
| H27  | 6082.96  | 441.7    | 1358.59 | 39 |
| H28A | 5734.83  | -2098.61 | 1586.25 | 67 |
| H28B | 4599.28  | -997.5   | 1506.37 | 67 |
| H28C | 5365.59  | -1019.72 | 2027.95 | 67 |
| H29A | 7067.63  | -298.64  | 445.6   | 70 |
| H29B | 5565.8   | -251.63  | 552.16  | 70 |
| H29C | 6488.31  | -1540.7  | 594.4   | 70 |
| H32  | 7911.86  | 5997.81  | 1706.37 | 25 |
| H33A | 7311.77  | 4917.91  | 524.37  | 47 |
| H33B | 7452.76  | 6115.9   | 848.03  | 47 |
| H33C | 6098.96  | 5685.36  | 875.21  | 47 |
| H34A | 8747.84  | 5516.79  | 2975.34 | 44 |
| H34B | 8898.93  | 6322.06  | 2413.79 | 44 |
| H34C | 9914.45  | 5120.8   | 2506.88 | 44 |
| H36  | 10230.31 | 3494.96  | 3113.15 | 34 |
| H37  | 10270.77 | 2049.1   | 3974.64 | 43 |
| H39  | 6752.25  | 2259     | 3422.06 | 34 |
| H40  | 7148.67  | 3531.72  | 5005.8  | 56 |
| H41  | 9216.3   | 4400.12  | 4780.74 | 62 |
| H42  | 8964.4   | 5963.59  | 3967.99 | 57 |
| H43  | 6776     | 6029.1   | 3684.24 | 52 |
| H44  | 5631.22  | 4514.96  | 4327.34 | 54 |
| H47  | 4828.76  | 2489.29  | 34.51   | 42 |
| H48  | 6690.68  | 1782.82  | -552.12 | 46 |
| H49  | 8674.75  | 1666.03  | -224.92 | 39 |
| H51  | 9242.42  | 2440.41  | 1144.38 | 35 |
| H52A | 9832.58  | 431.87   | 765.93  | 54 |
| H52B | 11043.69 | 1111.15  | 737.48  | 54 |
| H52C | 10387.59 | 1019.28  | 191.03  | 54 |
| H53A | 10034.18 | 3451.68  | 65.59   | 78 |

|      |         |         |         |    |
|------|---------|---------|---------|----|
| H53B | 10896.1 | 3324.25 | 558.85  | 78 |
| H53C | 9562.81 | 4223.61 | 617.89  | 78 |
| H54  | 4628.08 | 3772.19 | 1404.75 | 35 |
| H55A | 3541.37 | 1885.73 | 932.8   | 67 |
| H55B | 2776.71 | 2719.45 | 1428.46 | 67 |
| H55C | 4052.28 | 1810.44 | 1523.77 | 67 |
| H56A | 4071.23 | 5126.35 | 631.95  | 76 |
| H56B | 2831.28 | 4819.99 | 1013.56 | 76 |
| H56C | 3292.29 | 4136.15 | 437.58  | 76 |

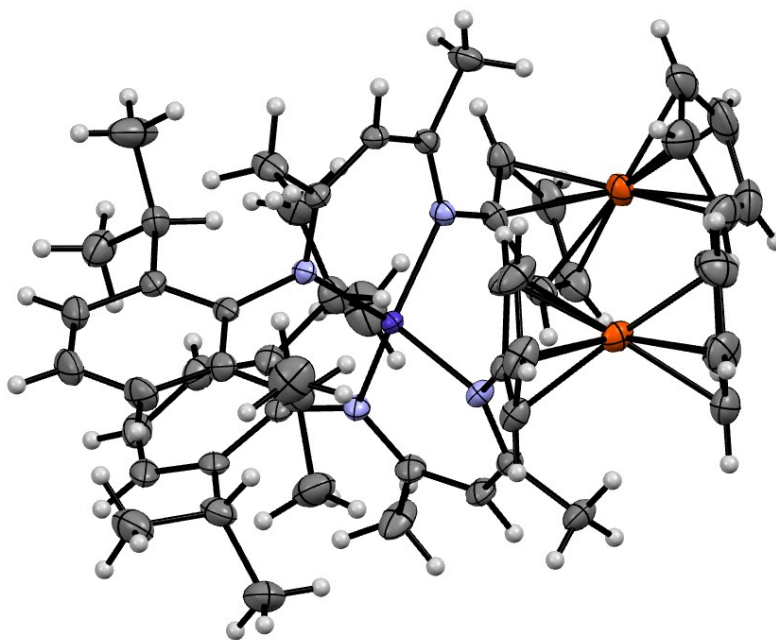

**Fig. S1** GC of the resulting solution of Cys-S-S-Cys with ferrocene.

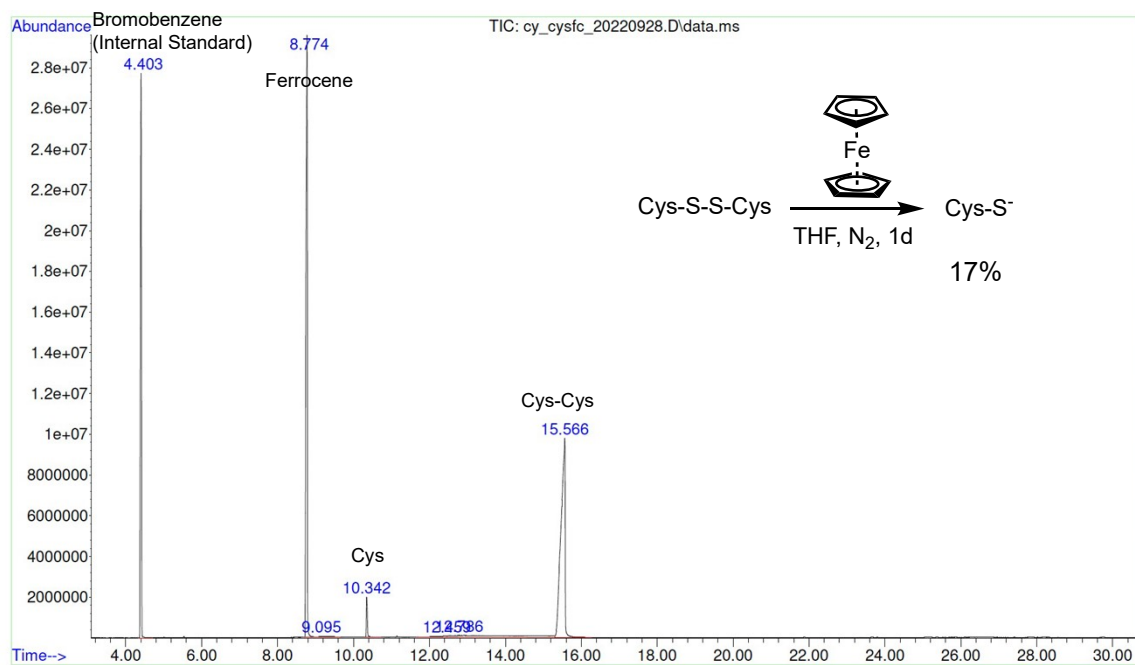

**Fig. S2** CV of Co(ArLFe)(NO)<sub>2</sub> (1) with scan rate at 50 mV

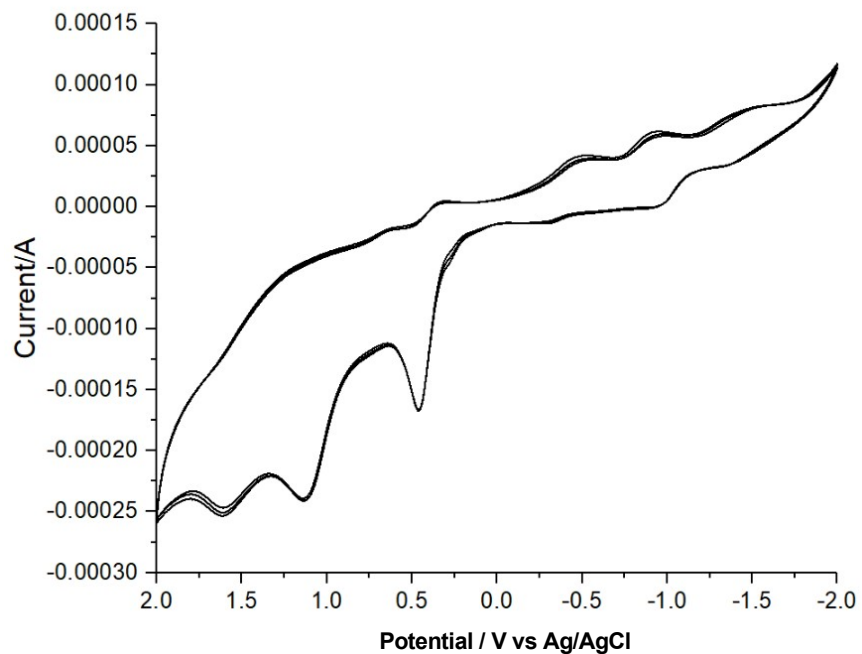

**Fig. S3** The time-course analysis of  $\nu\text{NO}(\text{ArLFcCo}(\text{NO})_2)$  in the reaction of  $\text{ArLFcCo}(\text{NO})_2$  with  $\text{BocNH-Cys-COOMe}$

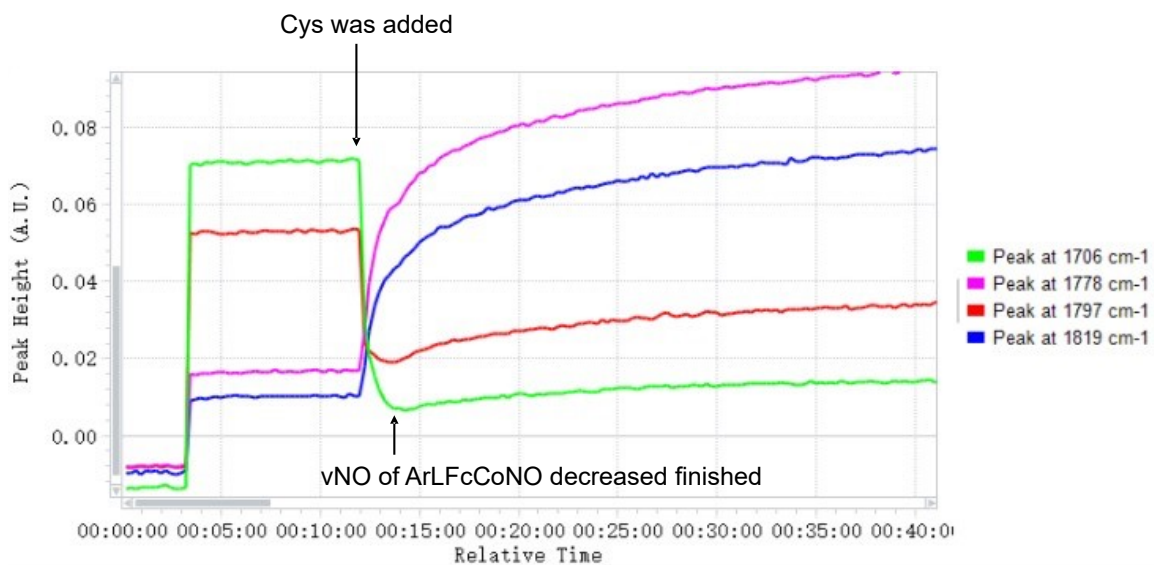



**Fig. S4** EI-MS of (a) BocNH-Cys-COOMe and (b) BocNH-CysNO-COOMe

(a)

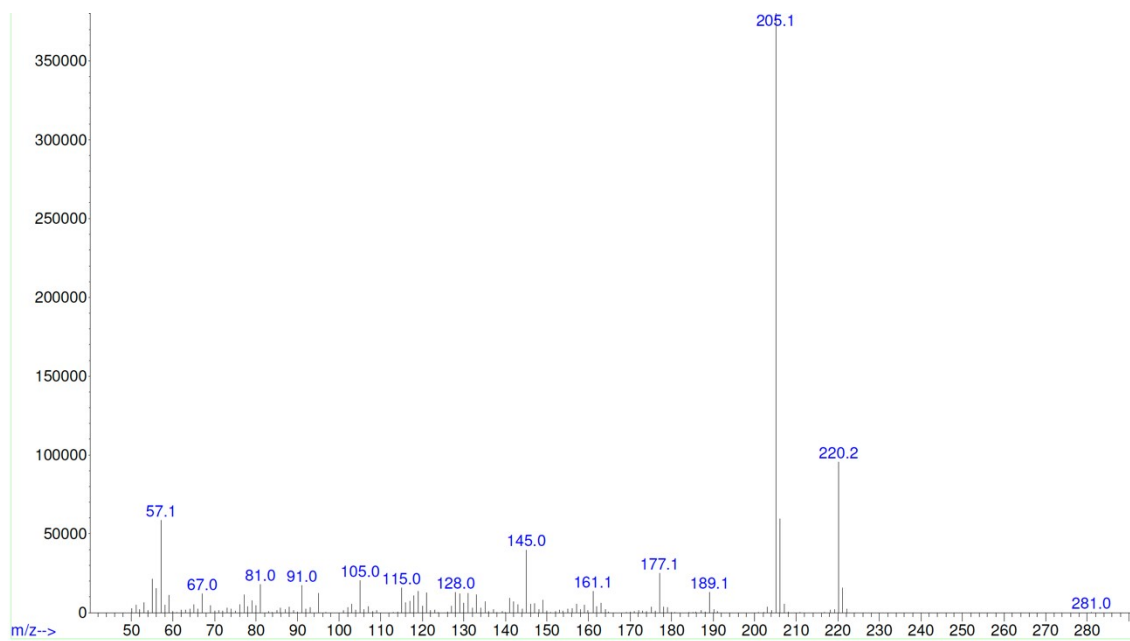

(b)

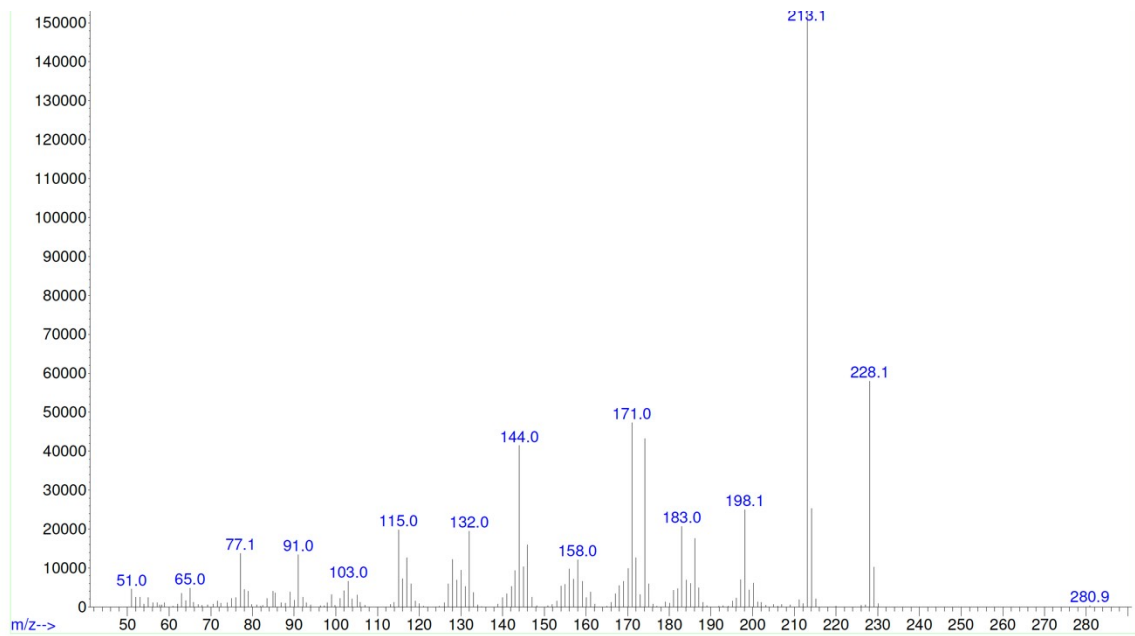

**Fig. S5 ESI-MS of (a) BocNH-Cys-COOME and (b) BocNH-CysNO-COOME**

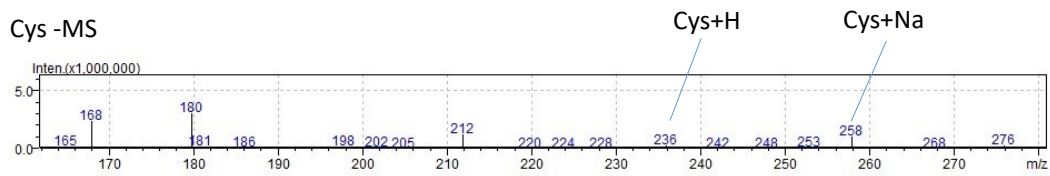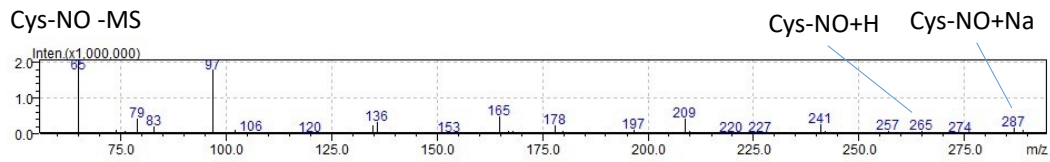

**Fig. S6 EPR spectrum of complex 1**

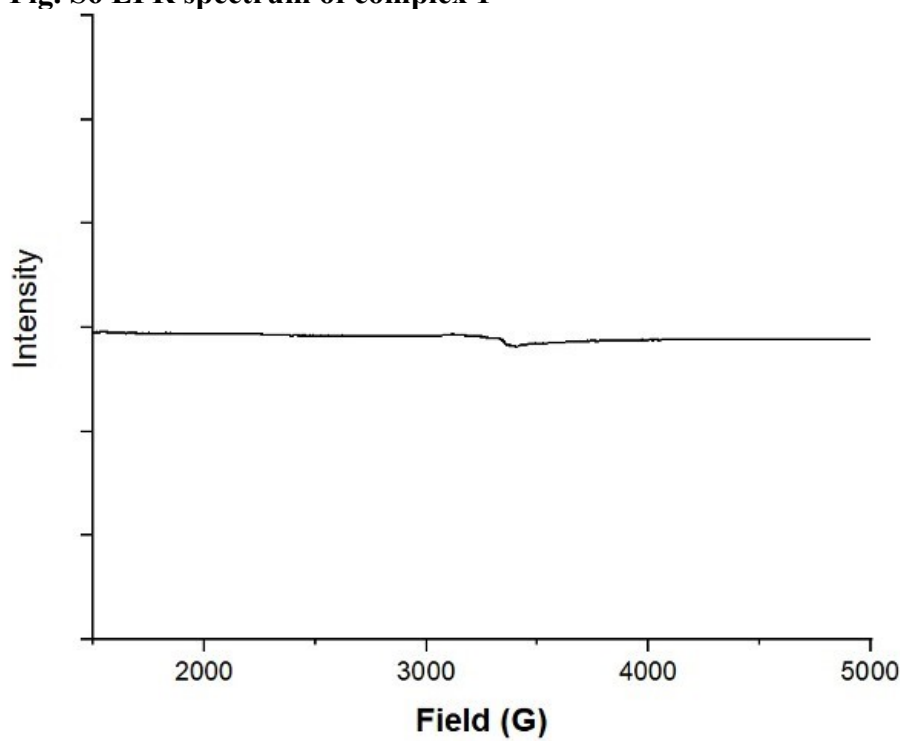

**Fig. S7 <sup>1</sup>H NMR of the formation of BocNH-CysNO-COOMe**

*Cys-NO* at  $\delta$  7.45 (s, 1H), 4.68 (m, 1H), 4.48-4.43 (m, 2H), and 3.80 (s, 3H)

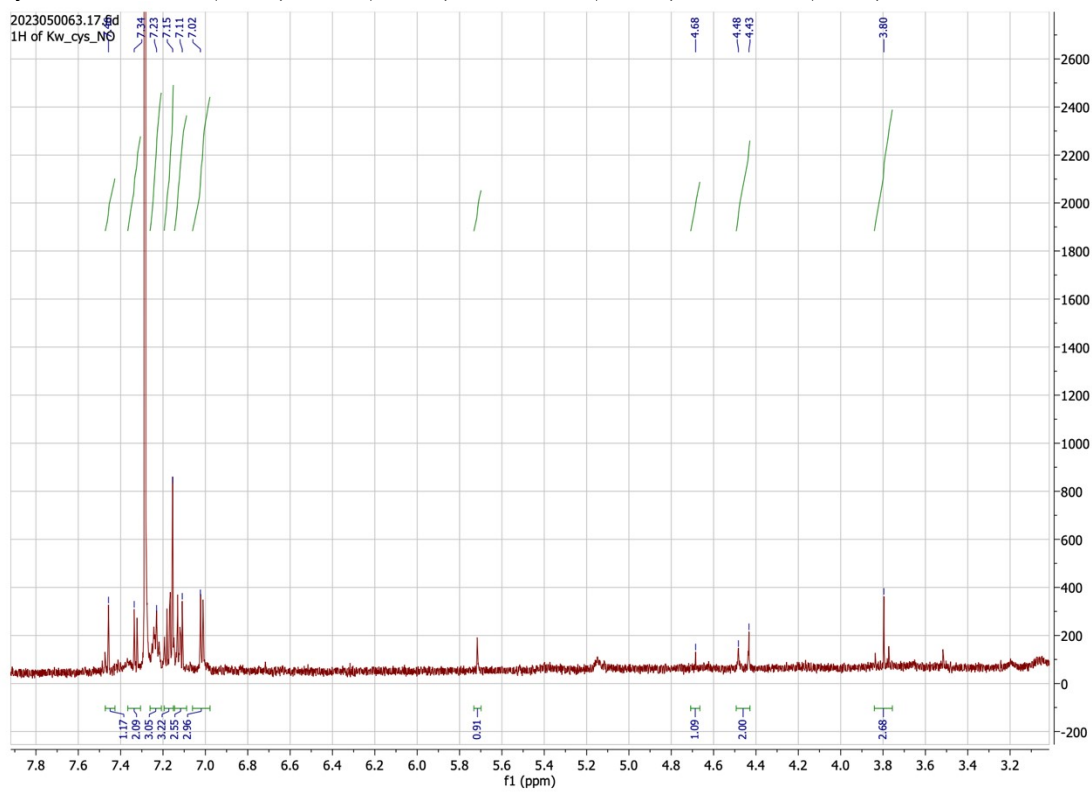

**Fig. S8**  $^{31}\text{P}$  NMR of the formation of  $\text{HNPPH}_3$

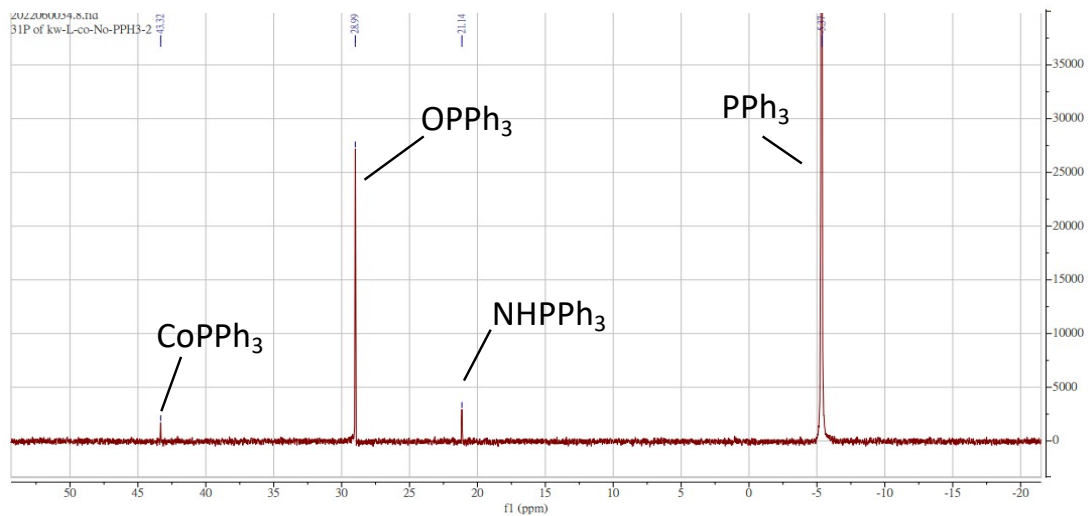

Supplement: d3cc02784h1.pdf [file d3cc02784h1.pdf]
